# Supplementary material for: Brief Communication: Update on the GPS reflection technique for measuring snow accumulation in Greenland
Source: Copernicus journal article supplement (doi:10.5194/tc-14-1985-2020), 2020-06-18
Supplement: Supplementary file 1 [file tc-14-1985-2020-supplement.zip]

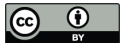

## *Supplement of*

# **Brief Communication: Update on the GPS reflection technique for measuring snow accumulation in Greenland**

**Kristine M. Larson et al.**

*Correspondence to:* Kristine M. Larson ([kristinem.larson@gmail.com](mailto:kristinem.larson@gmail.com))

- [tc-14-1985-2020-supplement-title-page.pdf](#)
- [gls1\\_poleRH\\_rev.txt](#)
- [gls2\\_poleRH\\_rev.txt](#)
- [gls3\\_poleRH\\_rev.txt](#)
- [smm3\\_poleRH\\_rev.txt](#)

The copyright of individual parts of the supplement might differ from the CC BY 4.0 License.
